# Supplementary material for: Impact of Subsurface Application of Compound Mineral Fertilizer on Soil Enzymatic Activity under Reduced Tillage
Source: MDPI journal article supplement (doi:10.3390/agronomy11112213), 2021-10-31
Supplement: s1 [file s1]

Table S1. Chemical plant protection during the growing seasons

| Plant Protection Product |                                                                                                                                                                                                                                                                            | Dose                                   | Application Date |
|--------------------------|----------------------------------------------------------------------------------------------------------------------------------------------------------------------------------------------------------------------------------------------------------------------------|----------------------------------------|------------------|
| <b>Soybean</b>           |                                                                                                                                                                                                                                                                            |                                        |                  |
| Seed dressing            | T75 DS/WS [thiuram (a compound from the dithiocarbamate group) -750 g·kg <sup>-1</sup> ]                                                                                                                                                                                   | 2g·kg <sup>-1</sup> seeds              | Before sowing    |
|                          | Nitragin                                                                                                                                                                                                                                                                   | 300 g·ha <sup>-1</sup>                 | Before sowing    |
| Herbicide                | Roundup 360 SL [glyphosate (a compound from the amino phosphonic acid group) as potassium salt - 360 g·dm <sup>-3</sup> ].                                                                                                                                                 | 1.5 dm <sup>3</sup> ·ha <sup>-1</sup>  | Before emergence |
|                          | Corum 502.4 SL [bentazon (a compound from the diazine group) - 480 g·dm <sup>-3</sup> ; imazamox (a compound from the imidazolinone group) - 22.4 g·dm <sup>-3</sup> ]                                                                                                     | 1.25 dm <sup>3</sup> ·ha <sup>-1</sup> | BBCH 12–25       |
| Adjuvant                 | Dash HC [methyl oleate - 348.75 g·dm <sup>-3</sup> ; fatty alcohol (alkoxylated phosphoric acid ester) - 209.25 g·dm <sup>-3</sup> ]                                                                                                                                       | 1.0 dm <sup>3</sup> ·ha <sup>-1</sup>  | BBCH 12–25       |
| <b>Winter wheat</b>      |                                                                                                                                                                                                                                                                            |                                        |                  |
| Seed dressing            | Scenic 080 FS [prothioconazole (a substance of the triazole group) – 37.5 g·dm <sup>-3</sup> ; fluoxastrobin (a substance) of the strobilurin group) – 37.5 g·dm <sup>-3</sup> tebuconazole (a substance of the triazole group) – 5 g·dm <sup>-3</sup> ]                   | 1 ml·kg <sup>-1</sup> seeds            | Before sowing    |
| Herbicide                | Axial 50 EC [pinoxaden (a compound of the phenylpyrazolin group) – 50 g·dm <sup>-3</sup> ].                                                                                                                                                                                | 0.9 dm <sup>3</sup> ·ha <sup>-1</sup>  | BBCH37           |
|                          | Mustang 306 SE [florasulam (a substance of the triazolopyrimidine group) – 6.25 g·dm <sup>-3</sup> ; 2,4-D (a substance belonging to the group of phenoxyacids) – 300 g·dm <sup>-3</sup> ]                                                                                 | 0.6 dm <sup>3</sup> ·ha <sup>-1</sup>  | BBCH 12–32       |
|                          | Capalo 337.5 SE [fenpropimorph (a compound of the morpholine group) – 200 g·dm <sup>-3</sup> ; epoxiconazole a compound of the triazole group) – 62.5 g·dm <sup>-3</sup> ; metraphenone (a compound of the diphenyl ketone group of derivatives) – 75 g·dm <sup>-3</sup> ] | 2.0 dm <sup>3</sup> ·ha <sup>-1</sup>  | end of tillering |
| Fungicide                | Optan 183 SE [pyraclostrobin (a substance of the strobilurin group) – 133 g·dm <sup>-3</sup> ; epoxiconazole (a substance of the triazole group) – 50 g·dm <sup>-3</sup> ]                                                                                                 | 1.5 dm <sup>3</sup> ·ha <sup>-1</sup>  | BBCH 25–69       |
|                          | Caramba 60 SL [metconazole (a compound of the triazole group) – 60 g·dm <sup>-3</sup> ]                                                                                                                                                                                    | 1.5 dm <sup>3</sup> ·ha <sup>-1</sup>  | BBCH 30–59       |
|                          | Tebu 250 EW [tebuconazole (a compound of the triazole group) – 250 g·dm <sup>-3</sup> ]                                                                                                                                                                                    | 1.0 dm <sup>3</sup> ·ha <sup>-1</sup>  | BBCH 30–59       |
| Insecticide              | Cyperkill max 500 EC [cypermethrin (a compound of the pyrethroid group) – 500 g·l <sup>-1</sup> ]                                                                                                                                                                          | 0.05 dm <sup>3</sup> ·ha <sup>-1</sup> | BBCH 30–59       |
| <b>Maize</b>             |                                                                                                                                                                                                                                                                            |                                        |                  |

|               |                                                                                                                                                                                                                                                                       |                                                                   |                  |
|---------------|-----------------------------------------------------------------------------------------------------------------------------------------------------------------------------------------------------------------------------------------------------------------------|-------------------------------------------------------------------|------------------|
| Seed dressing | ALIOS 300 FS [triticonazole (a compound of the triazole group) – 300 g·dm <sup>-3</sup> ]                                                                                                                                                                             |                                                                   |                  |
|               | Roundup 360 SL [glyphosate (a compound from the amino phosphonic acid group) as potassium salt – 360 g·dm <sup>-3</sup> ] and ammonium sulphate (21%N; 24%S)                                                                                                          | 4.0 dm <sup>3</sup> ·ha <sup>-1</sup> and 5.0 kg·ha <sup>-1</sup> | Spring           |
| Herbicide     | Lumax 537,5 SE [mesotrione (a compound of the group of triketones) – 37.5 g·dm <sup>-3</sup> ; s-metolachlor (a compound of the chloroacetoanilide group) – 312.5 g·dm <sup>-3</sup> ; terbuthylazine (a compound of the triazine group) – 187.5 g·dm <sup>-3</sup> ] | 4.0 dm <sup>3</sup> ·ha <sup>-1</sup>                             | Before emergence |
|               | Ikanos 040 OD [nicosulfuron (a compound of the group of sulfonylurea derivatives) – 40 g·dm <sup>-3</sup> ]                                                                                                                                                           | 1.0 dm <sup>3</sup> ·ha <sup>-1</sup>                             | Before emergence |
